# Supplementary material
Source: MDPI journal article supplement (https://www.mdpi.com/2072-4292/12/9/1386)

Figure S1. Patterns of water temperature at selected confluences C7, C8 and C14 (August 9 to September 13, 2017)

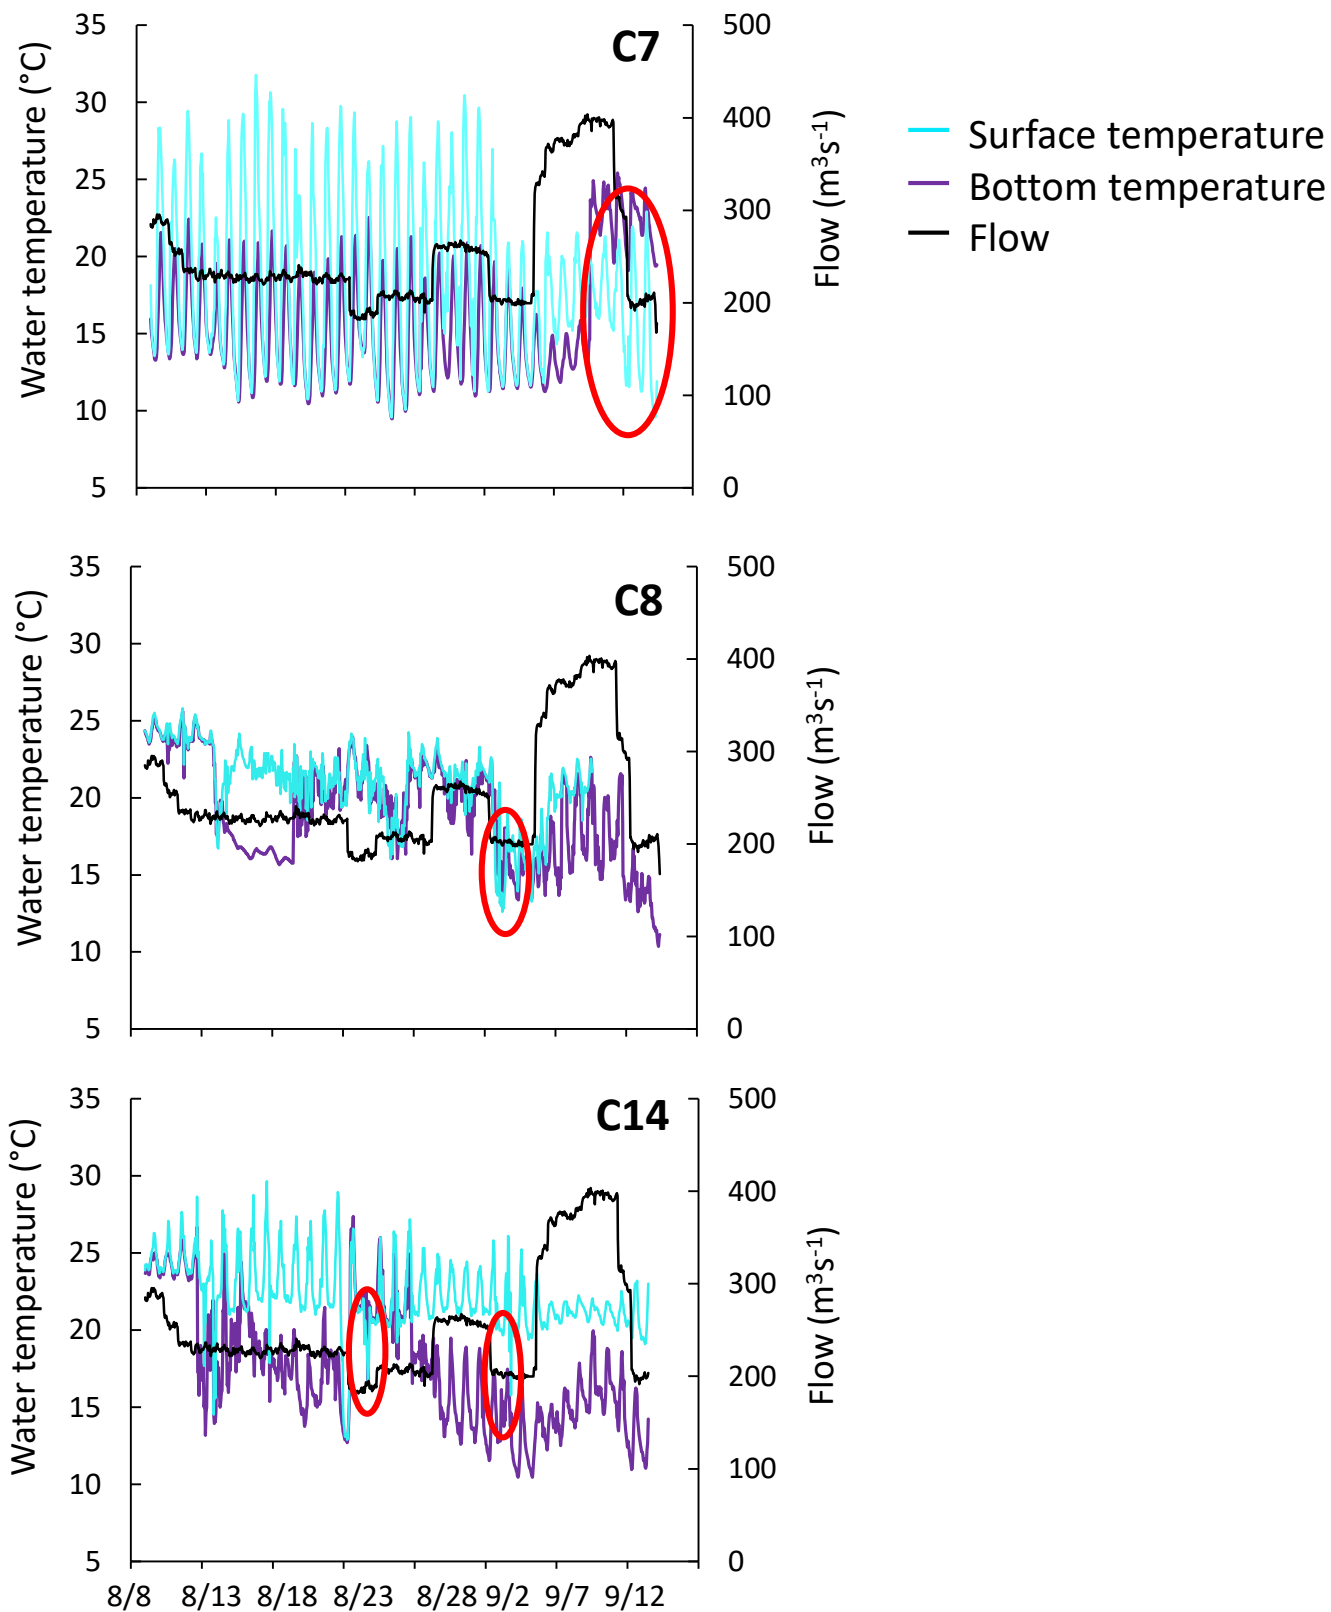

Supplement: s1 [file s1]
